# Supplementary material
Source: ML conference proceedings conference paper supplement (https://proceedings.mlr.press/v139/mora21a.html)
Supplement: Supplementary file [file mora21a-supp.pdf]

## A. Appendix

### A.1. Value function hessian

$$\begin{aligned}
 \frac{d^2 V^{\bar{a}}(s_0)}{d\bar{a}^2} &= \frac{d}{d\bar{a}} \left[ \frac{\partial V^{\bar{a}}}{\partial \bar{a}} + \frac{\partial V^{\bar{a}}}{\partial \mathbf{s}} \frac{d\mathbf{s}}{d\bar{a}} \right], \\
 &= \frac{d}{d\bar{a}} \left[ \frac{\partial V^{\bar{a}}}{\partial \bar{a}} \right] + \frac{d}{d\bar{a}} \left[ \frac{\partial V^{\bar{a}}}{\partial \mathbf{s}} \frac{d\mathbf{s}}{d\bar{a}} \right], \\
 &= \left[ \frac{d\mathbf{s}^T}{d\bar{a}} \frac{\partial^2 V^{\bar{a}}}{\partial \mathbf{s} \partial \bar{a}} + \frac{\partial^2 V^{\bar{a}}}{\partial \bar{a}^2} \right] + \frac{d}{d\bar{a}} \left[ \frac{\partial V^{\bar{a}}}{\partial \mathbf{s}} \right] \frac{d\mathbf{s}}{d\bar{a}} + \frac{\partial V^{\bar{a}}}{\partial \mathbf{s}} \frac{d}{d\bar{a}} \left[ \frac{d\mathbf{s}}{d\bar{a}} \right], \\
 &= \left[ \frac{d\mathbf{s}^T}{d\bar{a}} \frac{\partial^2 V^{\bar{a}}}{\partial \mathbf{s} \partial \bar{a}} + \frac{\partial^2 V^{\bar{a}}}{\partial \bar{a}^2} \right] + \left[ \frac{d\mathbf{s}^T}{d\bar{a}} \frac{\partial V^{\bar{a}}}{\partial \mathbf{s}} + \frac{\partial^2 V^{\bar{a}}}{\partial \bar{a} \partial \mathbf{s}} \right] \frac{d\mathbf{s}}{d\bar{a}} + \frac{\partial V^{\bar{a}}}{\partial \mathbf{s}} \left[ \frac{d\mathbf{s}^T}{d\bar{a}} \frac{\partial}{\partial \mathbf{s}} \frac{d\mathbf{s}}{d\bar{a}} + \frac{\partial}{\partial \bar{a}} \frac{d\mathbf{s}}{d\bar{a}} \right], \\
 &= \frac{\partial V^{\bar{a}}}{\partial \mathbf{s}} \left( \frac{d\mathbf{s}^T}{d\bar{a}} \frac{\partial}{\partial \mathbf{s}} \frac{d\mathbf{s}}{d\bar{a}} + \frac{\partial}{\partial \bar{a}} \frac{d\mathbf{s}}{d\bar{a}} \right) + \frac{d\mathbf{s}^T}{d\bar{a}} \left( \frac{\partial^2 V^{\bar{a}}}{\partial \mathbf{s}^2} \frac{d\mathbf{s}}{d\bar{a}} + 2 \frac{\partial^2 V^{\bar{a}}}{\partial \mathbf{s} \partial \bar{a}} \right) + \frac{\partial^2 V^{\bar{a}}}{\partial \bar{a}^2}.
 \end{aligned}$$

### A.2. Detailed description of environments

Table 2: Summary of environments

| Environment          | State space            | Action space | Total mass | Constraints                   | Additional Info                             |
|----------------------|------------------------|--------------|------------|-------------------------------|---------------------------------------------|
| 2D Simple Pendulum   | 5                      | 1            | 50gr       | Handle along horizontal axis  |                                             |
| 3D Simple Pendulum   | 8                      | 2            | 50gr       | Handle on horizontal plane    |                                             |
| 3D Double Pendulum   | 14                     | 2            | 100gr      | Handle on horizontal plane    |                                             |
| Cable driven payload | $2*4 + 2 = 10$         | 2            | 200gr      | Handles along horizontal axis | Attachment to handle uses deformable cables |
| Rope in 3D           | $3*5*2 + 2 = 34$       | 2            | 250gr      | Handle on horizontal plane    | All conections are deformable cables        |
| Cloth                | $3*25*2 + 2*3*2 = 162$ | $2*3*2 = 12$ | 100gr      | Handles move freely on 3D     | Uses differentiable frictional contacts     |

For the following environments we used a fixed time horizon of 150 steps with a time step of 24ms, with the exception of the cloth where we used a time horizon of 60 steps with a time step of 16ms.

- **2D Simple Pendulum:** This system corresponds to a cable-driven pendulum in 2D (Figure 2 left). The handle of the pendulum is constrained to move only along the horizontal axis in order to test the degree to which a control policy can exploit the natural dynamics of the system.
- **3D Simple Pendulum:** For this system the pendulum is free to move in 3D, but the handle is restricted to moving along a horizontal plane.
- **3D Double Pendulum:** Extending the dynamical system above, the payload for this problem consists of two mass points that are coupled to each other via a stiff bilateral spring. The dimensionality of the state space doubles, and the system exhibits very rich and dynamic motions.
- **Cable driven payload 2D:** For this environment we have a densely connected network of 4 point masses and two handles that are constrained to move along the horizontal axis.
- **Rope in 3D:** For this environment we use 5 point masses to discretize a rope in 3D and one handle that is constrained to move on the horizontal plane.

- **Cloth:** For this environment we use 25 point masses to discretize a piece of cloth and both handles can move freely in 3D. Furthermore, frictional contact against a table is applied to each point mass.

### A.3. Architecture of neural network policies

The neural networks representing the control policies for all our environments share the same architecture, 2 fully connected layers of 256 units each with ReLU activations and one output layer with Tanh activation, to ensure that the policy only outputs commands that are within the velocity limits.

### A.4. Differentiable simulator

Following the approach in (Zimmermann et al., 2018), the sensitivity  $\frac{ds}{da}$  has the structure of the figure below.

$$\frac{ds}{da} = - \left( \frac{\partial \mathbf{G}}{\partial s} \right)^{-1} \frac{d\mathbf{G}}{da}$$
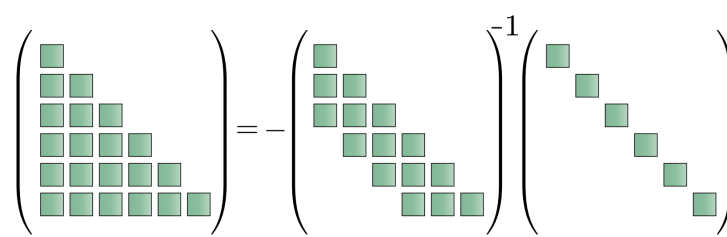

Figure 7: Structure of sensitivity matrix  $\frac{ds}{da}$  that encodes the dependency of a state on all the previous actions <sup>1</sup>

### A.5. PODS: Additional figures

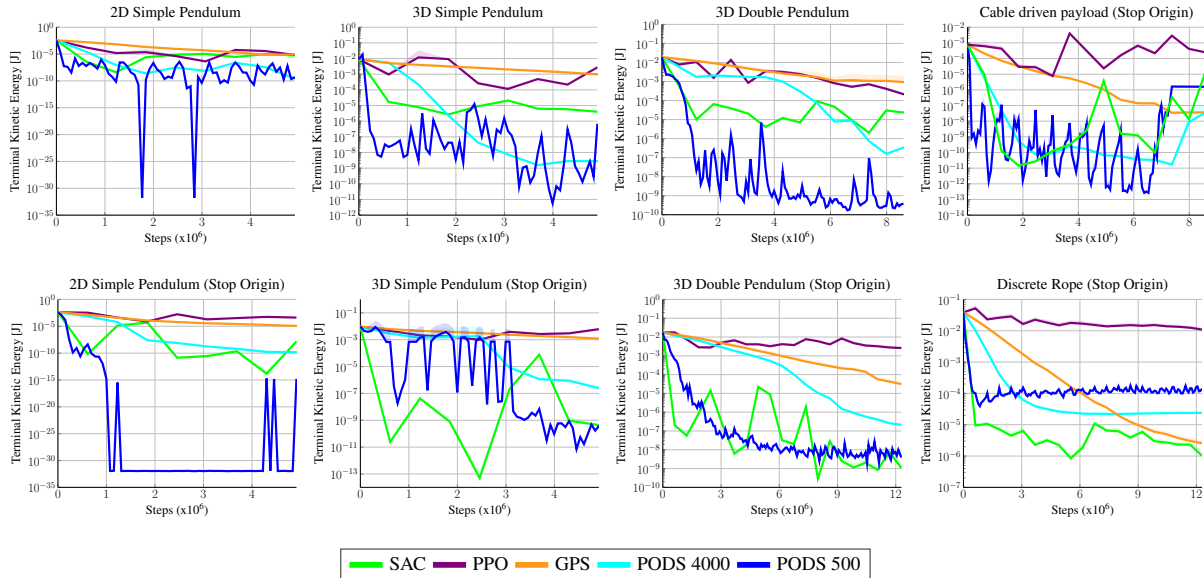

Figure 8: Final Kinetic Energy (averaged over a period of 10 time-steps after the policy is rolled out)

<sup>1</sup>Figure reproduced with authorization of the authors ( <http://arxiv.org/abs/1905.08534> )

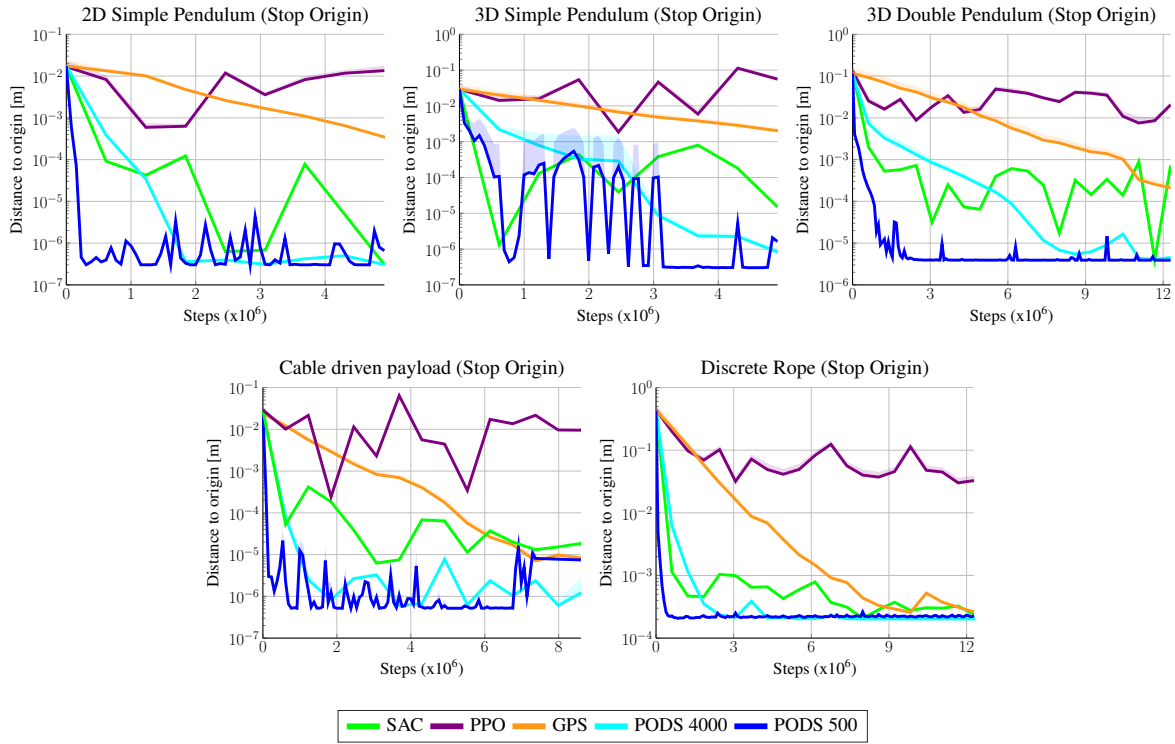

Figure 9: Final distance to Origin

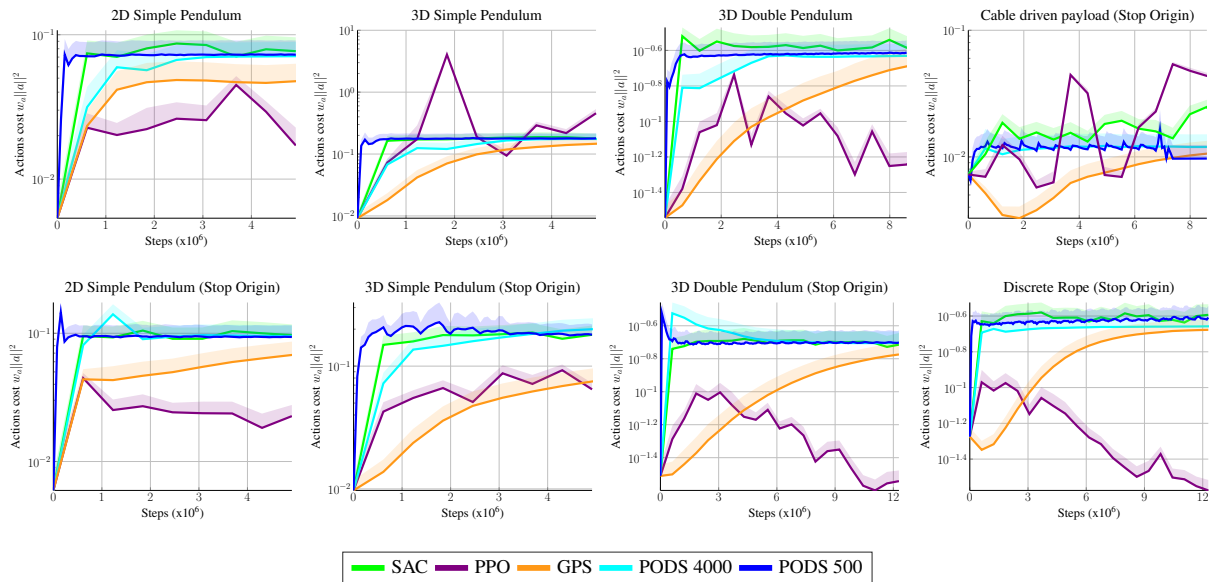

Figure 10: Average handle velocity (control effort)
